# Supplementary material for: Two-dimensional aluminum phosphide semiconductor with tunable direct band gap for nanoelectric applications
Source: Royal Society of Chemistry journal article supplement (doi:10.1039/d0ra04424e), 2020-01-01
Supplement: d0ra04424e1.pdf [file d0ra04424e1.pdf]

Electronic Supplementary Material (ESI) for RSC Advanced Materials

## Supporting Information

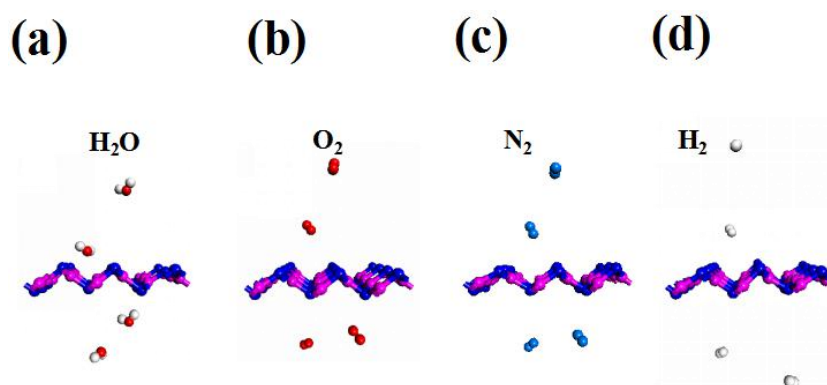

Fig. S1 *Ab initio* MD snapshots of the V-AlP  $3 \times 3$  supercell structures exposed to the high pressure (a) water vapour, (b) oxygen gas, (c) nitrogen gas and (d) hydrogen gas at temperatures  $T=300\text{K}$ .
